# Supplementary material
Source: ML conference proceedings conference paper supplement (https://openreview.net/forum?id=1a9daUteZn)

$\Delta_i$ 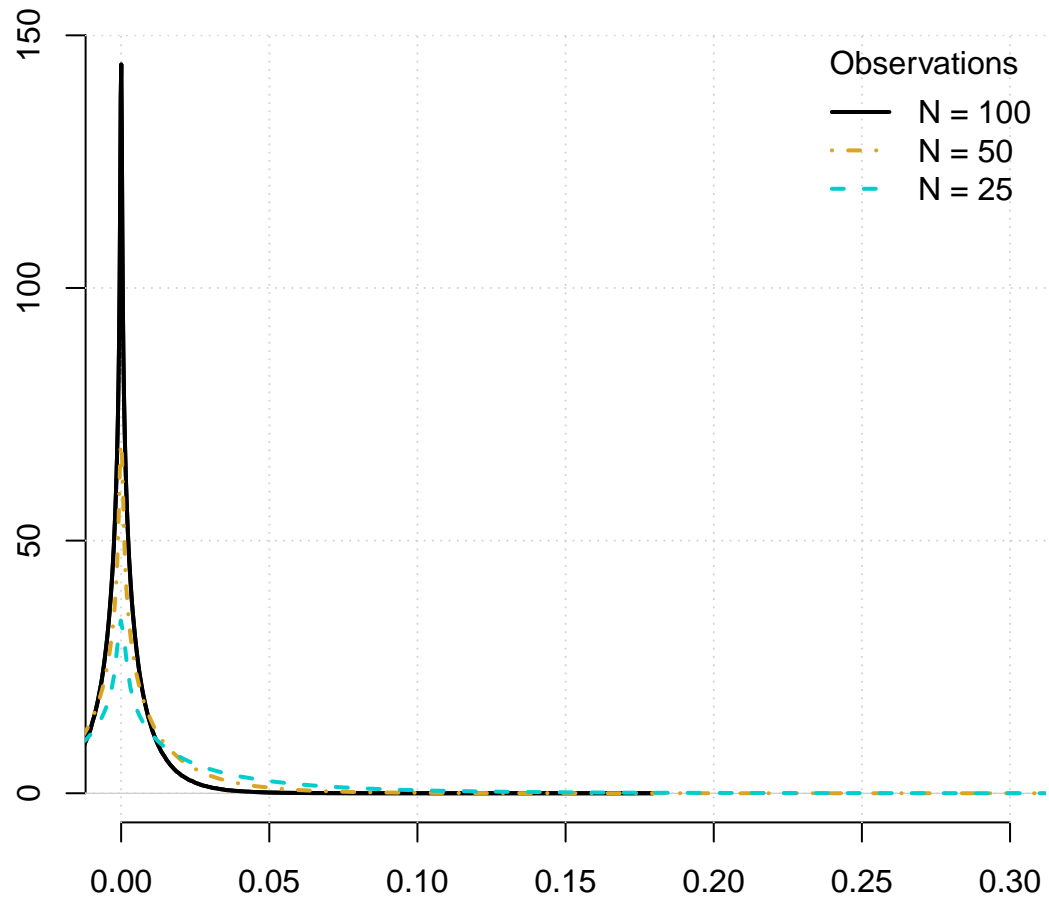 $\max \Delta_i$ 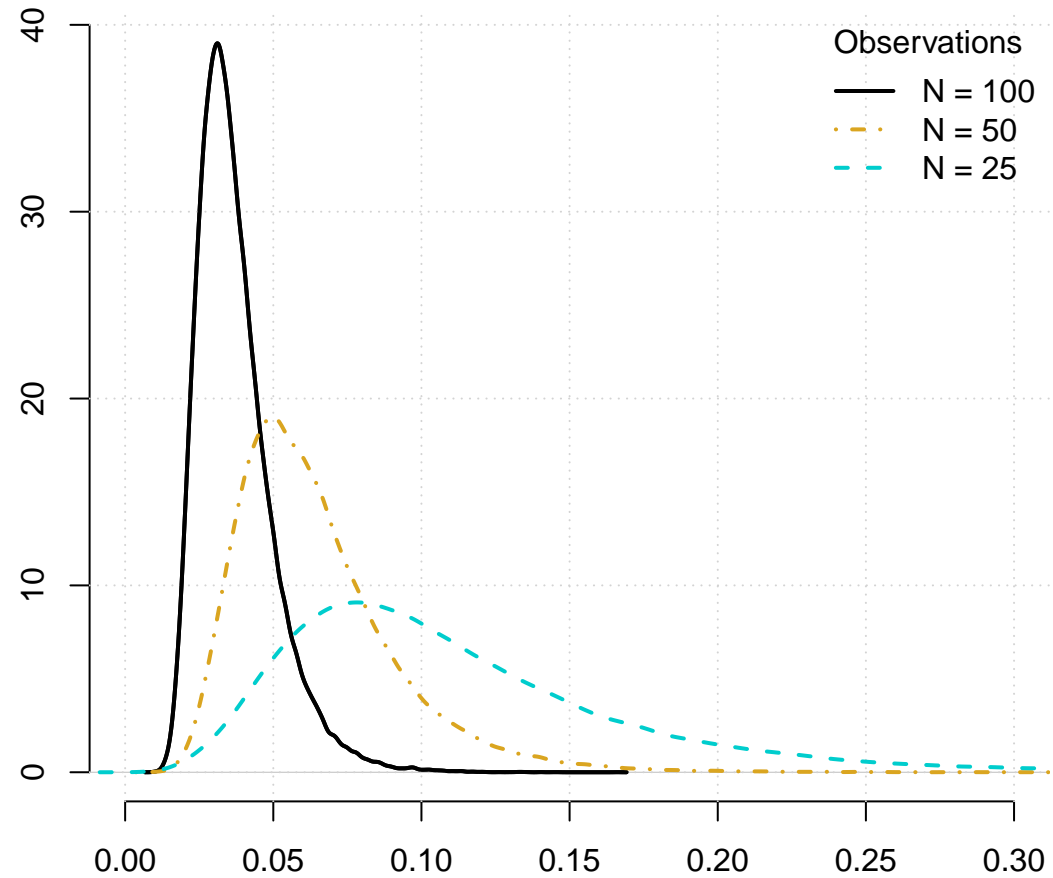

Supplement: supplementary_material [file fig1.pdf › testingMIS-main/paper/plots/fig1.pdf]

**(a) Effect of Influential Observation**

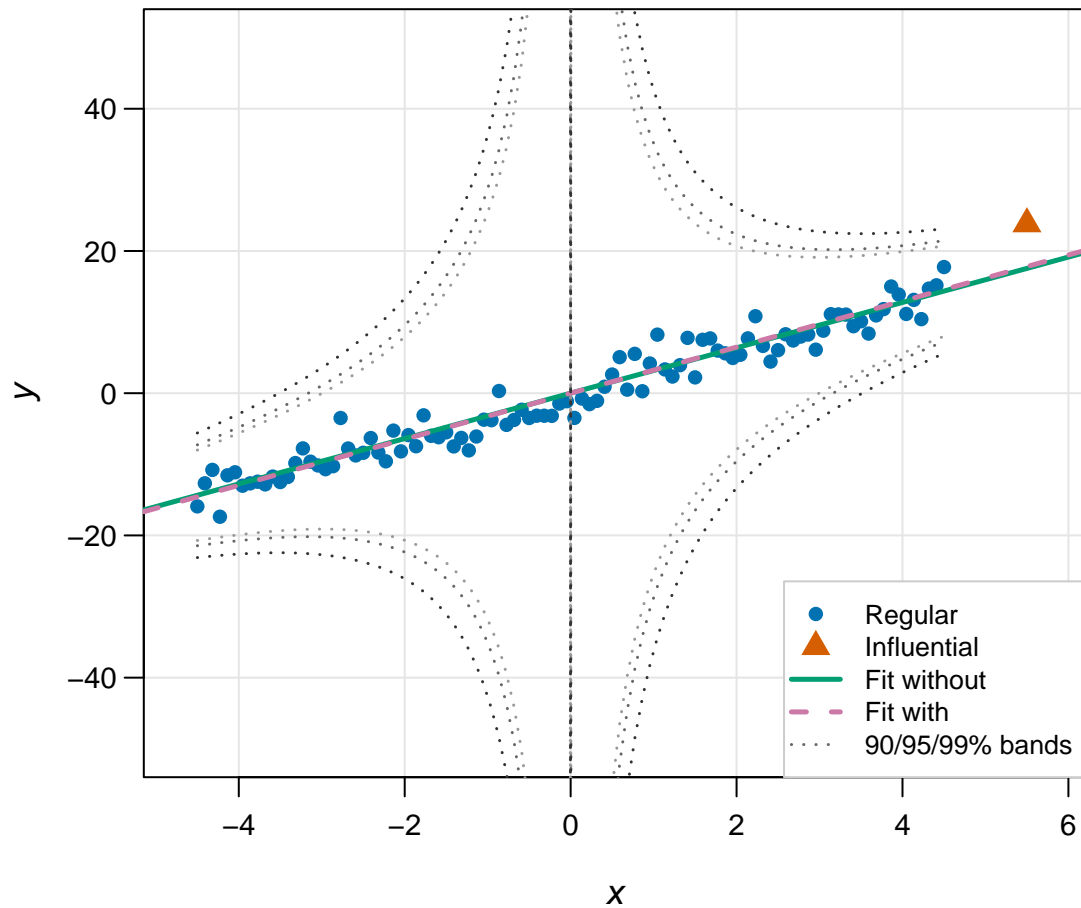

**(b) Extreme Value Analysis**

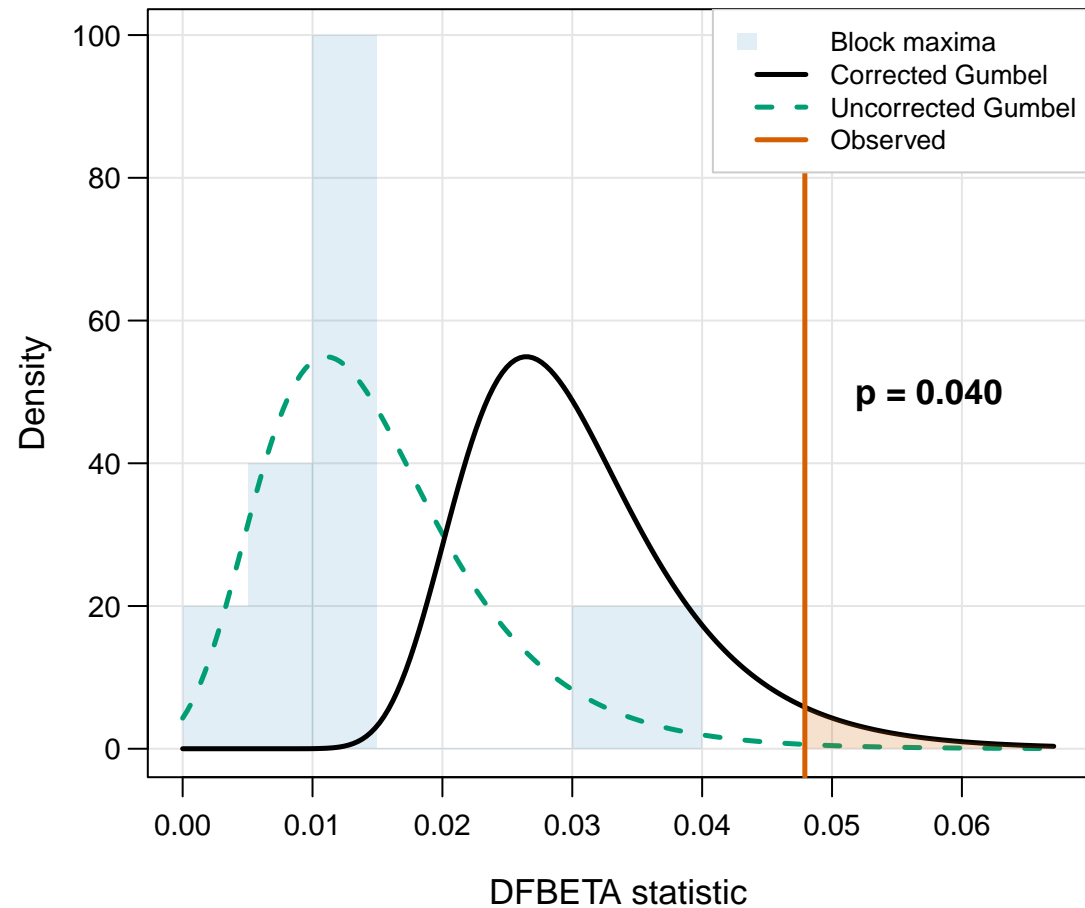

Supplement: supplementary_material [file fig2.pdf › testingMIS-main/paper/plots/fig2.pdf]

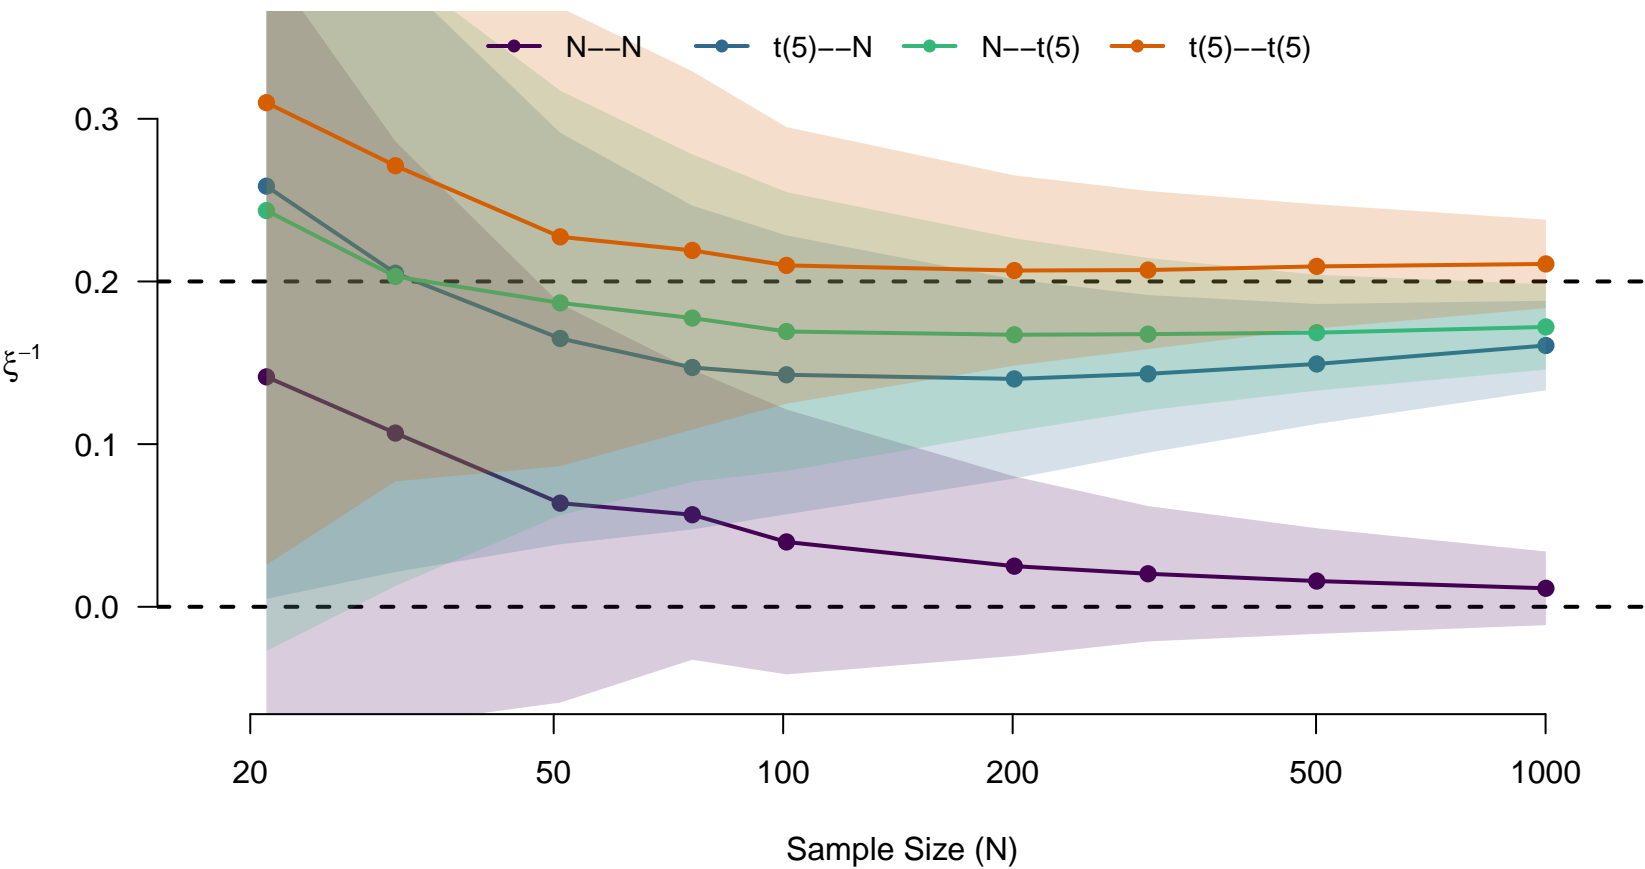

Supplement: supplementary_material [file fig3.pdf › testingMIS-main/paper/plots/fig3.pdf]

**(a) Average Gumbel Densities**

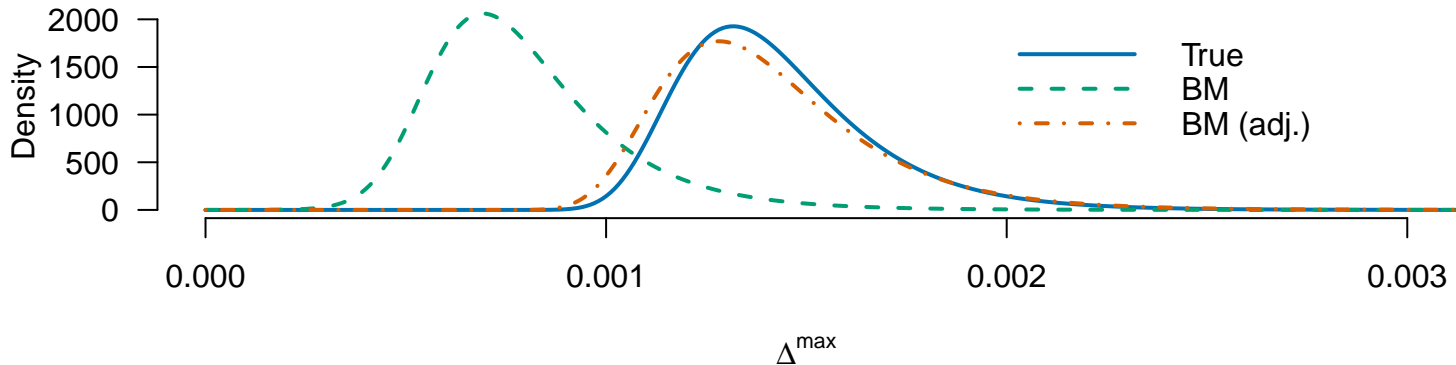

**(b) Location Parameter  $\tilde{a}$**

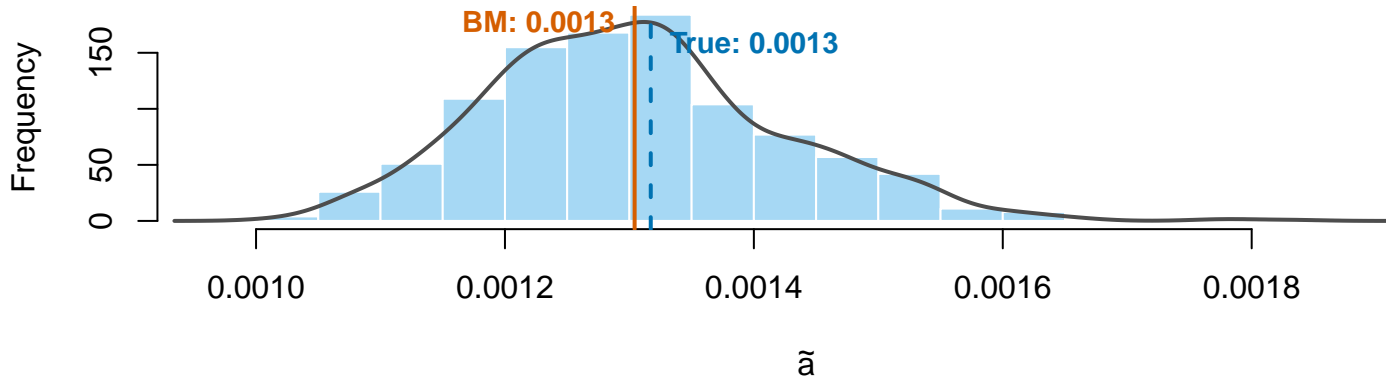

**(c) Scale Parameter b**

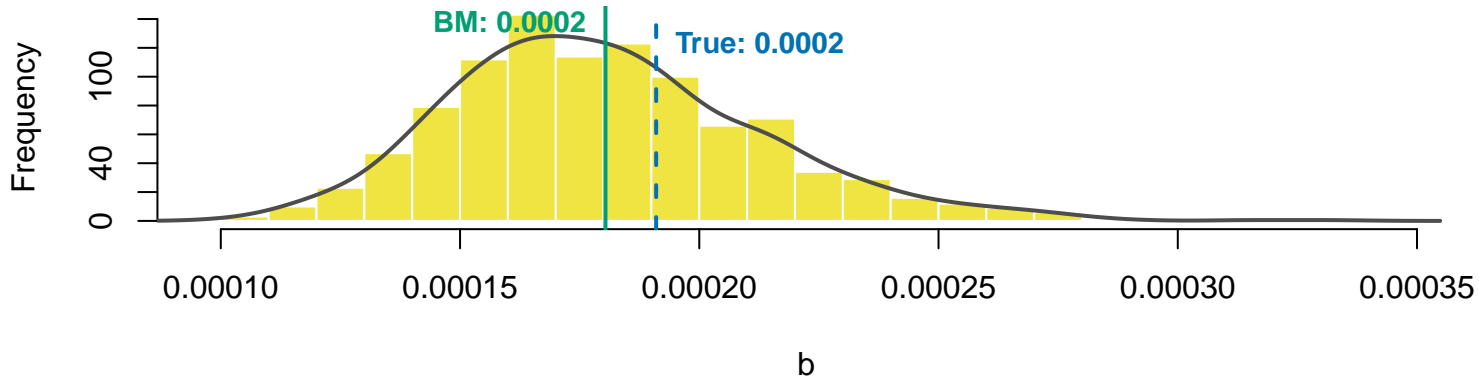

Supplement: supplementary_material [file figA1.pdf › testingMIS-main/paper/plots/figA1.pdf]
